# 1 **A model of Zebrafish Avatar for co-clinical trials**

2 Alice Usai<sup>1†</sup>, Gregorio Di Franco<sup>2,†</sup>, Patrizia Colucci<sup>1</sup>, Luca Emanuele Pollina<sup>3</sup>,  
3 Enrico Vasile<sup>4</sup>, Niccola Funel<sup>3</sup>, Matteo Palmeri<sup>2</sup>, Luciana Dente<sup>1</sup>, Alfredo  
4 Falcone<sup>4</sup>, Luca Morelli<sup>2‡</sup>, Vittoria Raffa<sup>1‡\*</sup>

5 †: Equally contributing

6 ‡: Equally contributing

7 \*corresponding [vittoria.raffa@unipi.it](mailto:vittoria.raffa@unipi.it)

8 1. Department of Biology, Università di Pisa, S.S. 12 Abetone e Brennero 4,  
9 56127 Pisa, Italy.

10 2. Department of Traslational Research and of New Surgical and Medical  
11 Technologies, General Surgery Unit, University of Pisa, Via Paradisa 2, 56124 Pisa,  
12 Italy.

13 3. Department of Surgical, Medical, Molecular Pathology and Critical Area,  
14 Division of Surgical Pathology, University of Pisa, Via Paradisa 2, 56124 Pisa,  
15 Italy.

16 4. Division of Medical Oncology, Pisa University Hospital, Via Roma 67, 56126  
17 Pisa, Italy.

18 **KEYWORDS** patient-derived xenografts, zebrafish, chemosensitivity,  
19 equivalent dose, translational research

20 **COMPETING INTERESTS**

21 The authors declare no conflicts of interest.

22

## 23 ABSTRACT

24 Animal “Avatars” and co-clinical trials represent an emerging concept for  
25 implementing schemes of personalized medicine in oncology. In a co-clinical  
26 trial, the cancer cells of the patient tumor are xenotransplanted in the animal  
27 Avatar for drug efficacy studies and data collected in the animal trial are used  
28 to plan the best drug treatment in the patient trial. Recently, zebrafish has  
29 been proposed for implementing Avatar models but the lack of a general  
30 criterion for chemotherapy dose conversion from humans to fishes represents  
31 a limitation for conducting co-clinical trials.

32 Here, we validate a simple, reliant and cost-effective Avatar model based on  
33 the use of zebrafish larvae; by crossing data from safety and efficacy studies,  
34 we found a basic formula for the estimation of the dose to be used for running  
35 co-clinical trials and we validate it in a clinical study enrolling 24 adult patients  
36 with solid cancers (XenoZ, NCT03668418).

## 37 ABBREVIATIONS

38 5-FU, 5-Fluorouracil; dpf, days post fertilization; DMEM, Dulbecco’s modified  
39 Eagle’s medium; FBS, fetal bovine serum; ECF, 5-Fluorouracil + Cisplatin +  
40 Epirubicin; FLOT, 5-Fluorouracil + Lederfolin + Oxaliplatin + Docetaxel;  
41 FOLFIRI, 5-Fluorouracil + Lederfolin + Irinotecan; FOLFOX, 5-Fluorouracil +  
42 Lederfolin + Oxaliplatin; FOLFOXIRI, 5-Fluorouracil + Lederfolin + Oxaliplatin  
43 + Irinotecan; GEM, Gemcitabine; GEMCIS, Gemcitabine + Cisplatin;  
44 GEM/nab-P, Gemcitabine + *nab*-Paclitaxel; GEMOX, Gemcitabine +  
45 Oxaliplatin; hpf, hours post fertilization; hpi, hours post injection

## 47 INTRODUCTION

48 Precision medicine refers to the approaches for tailoring a medical treatment  
49 to the individual characteristics of each patient (1). In particular, the “Mouse  
50 Avatar” is an emerging approach of precision medicine in oncology that has  
51 recently grown in importance (2); it implicates the xenotransplantation of  
52 cancer cells from patient tumor sample in mouse models to use them in drug  
53 efficacy studies. Mouse Avatars can be used to run “co-clinical trials” (3). In a  
54 co-clinical trial, the patient and murine trials are concurrently conducted and  
55 the drug efficacy response of the mouse study provides data to plan the best  
56 drug treatment of the patient tumor (4). The advantage of this approach is that  
57 each patient has his/her own tumor growing in an *in vivo* system, thereby  
58 allowing the identification of a personalized therapeutic approach. Nowadays,  
59 there are companies providing mouse Avatar generation and drug testing  
60 services to patients at a cost of tens thousands of dollars (5). The high cost is  
61 directly associated to the time-consuming process and the requirement of  
62 immunosuppressed strains (6). Unfortunately, this makes Avatars a cutting-  
63 edge technology available only for few people, posing a serious threat to the  
64 equal right to health for everyone. Recently, it has been proposed the use of  
65 zebrafish to make Avatars available for every patient and the approach  
66 sustainable for National Healthcare Systems. Zebrafish cancer models  
67 overcome the drawbacks of xenografts in mice (7). Zebrafish is highly fecund,  
68 develops rapidly and requires simple and inexpensive housing. Zebrafish  
69 embryos are transparent, allowing to image the engrafted cells *in vivo*, and  
70 they have high permeability to small molecules such as drugs used for  
71 chemotherapy. Last but not least they have low ethical impact when used in

72 the larval stage from fecundation to 120 hours post fertilization (hpf) (8).  
73 Zebrafish larvae as model for human cancer cell xenografts have been firstly  
74 reported in 2005 (9). Since then, the use of zebrafish *in vivo* model of  
75 xenotransplantation has increased considerably (10). Several human cancer  
76 cells lines e.g. melanoma, glioma, adenocarcinoma, breast, pancreas and  
77 prostate cancer cell lines (11) as well as fragments of human cancer tissues  
78 (12) have been tested to date in zebrafish as engraftment host. Larvae  
79 provide a rejection-free permissive environment, where the xenotransplanted  
80 human cancer cells rapidly proliferate, migrate, form masses and induce neo-  
81 angiogenesis, after injection (13). Most importantly, zebrafish larvae  
82 xenografts provide similar chemosensitive response of mouse xenografts  
83 (14).

84 However, in order to move forward in new paradigm of co-clinical trial using  
85 zebrafish Avatars, some critical aspects need to be solved. The biggest issue  
86 is related to the lack of the “equivalent dose” for translating the chemotherapy  
87 dosage used in humans to zebrafish larvae because one cannot apply the  
88 interspecies allometric approach for dose conversion from human to animal.  
89 The caveat is that chemotherapy drugs have to be administered in the fish  
90 water rather than injected as parenteral formulations. Therefore, drug safety  
91 and efficacy assessments are necessary to estimate the equivalent dose to  
92 administer (15). The present study aims to fill the gap regarding the dose  
93 conversion between zebrafish larvae and humans. A safety/efficacy study has  
94 been carried out in HCT 116 and MIA PaCa-2 cancer cell lines by testing 10  
95 different chemotherapy regimens used in cancer treatment, i.e. FOLFOX (5-  
96 Fluorouracil + Lederfolin + Oxaliplatin), FOLFIRI (5-Fluorouracil + Lederfolin +

97 Irinotecan), FOLFOXIRI (5-Fluorouracil + Lederfolin + Oxaliplatin +  
98 Irinotecan), ECF (5-Fluorouracil + Cisplatin + Epirubicin), FLOT (5-  
99 Fluorouracil + Lederfolin + Oxaliplatin + Docetaxel), GEMCIS (Gemcitabine +  
100 Cisplatin), Gem/nab-P (Gemcitabine + nab-Paclitaxel), GEMOX (Gemcitabine  
101 + Oxaliplatin), Gemcitabine, 5-Fluorouracil. We found a general criterion for  
102 dose equivalence that has been validated on zebrafish Avatar receiving fresh  
103 tissue fragments taken from surgical specimens of patients underwent  
104 surgical operation for hepato-biliary-pancreatic cancer and gastro-intestinal  
105 cancer.

## 106 RESULTS

### 107 **Zebrafish safety study**

108 Dose-response analysis for the determination of the effects of chemotherapy  
109 treatment on larvae was based on the evaluation of the phenotype resulting  
110 from the exposure (i.e. normal, aberrant and dead). In particular, we exposed  
111 larvae to 10 different chemotherapy treatments (GEM, GEMOX, GEM/nab-P,  
112 GEMCIS, 5-FU, FOLFOX, FOLFIRI, FLOT, FOLFOXIRI, ECF, see  
113 supplementary tables S1 and S2) for 72 hours, from 48 to 120 hpf (Figure 1).  
114 Chemotherapy treatments induced death and a variety of malformations in  
115 larvae, including yolk sac edema, pericardial edema and spine deformation.  
116 For all regimens, deviation from phenotype without defect (normal phenotype)  
117 increased with the increase of drug concentration. Linear regression analysis  
118 showed an excellent relationship between the linear or logarithmic  
119 concentration of the chemotherapy drug and the incidence of normal  
120 phenotype ( $R^2 > 0.95$ ;  $p < 0.05$  for any protocol tested) or the incidence of

121 mortality ( $R^2 > 0.87$ ;  $p < 0.05$  for any protocol tested), (Figure 1). For any  
122 chemotherapy treatment, the dose that is lethal to 25% of the population  
123 (LD25) and the concentration at which 50% of the normal phenotype is  
124 inhibited (IC50) was determined (Figure 2A). Such data were also expressed  
125 as Conversion Factor (CF):

$$126 \quad CF = \frac{EPC}{LC25} \quad \text{or} \quad CF = \frac{EPC}{IC50} \quad \text{Eq.1}$$

127 With EPC defined as human Equivalent Plasma Concentration, given by:

$$128 \quad EPC = \frac{M}{V} \quad \text{Eq.2}$$

129  $M$  being the total amount (mg) of chemotherapy administered to humans by  
130 the clinicians involved in the present study,  $V$  (ml) being the mean volume of  
131 human plasma (the EPC value for each regimen is given in table S2).

132 In the present study, we fixed the 75 percentiles of the box plots (Figure 2B)  
133 as CF corresponding to the maximum tolerated doses (MTDs). Interestingly,  
134 this value was similar for the 2 conditions, i.e.  $CF = 4.1$  and  $CF = 4.6$  for  
135 EPC/LD25 and EPC/IC50, respectively. Consequently, the toxicity study  
136 established a conversion factor  $4.6 \leq CF < \infty$  as the range for the  
137 determination of the equivalent dose required for running co-clinical trials with  
138 an acceptable safety level for the zebrafish trial.

139 **Figure 1 Chemotherapy toxicity study.** *Zebrafish embryos 2 dpf were*  
140 *incubated with media (E3 supplemented with 10000 U/ml penicillin and 100*  
141 *µg/ml streptomycin) modified with chemotherapy drugs or not modified at*  
142 *35°C for 3 days. At the end of the treatment the percentage of dead embryo*  
143 *(red), aberrant (blue) and normal phenotype (green) was evaluated after*  
144 *fixation and stereomicroscope observation. In GEM, GEMOX, GEM/nab-P,*

145 *GEMCIS we reported the Gemcitabine concentration in the x-axis. In 5-FU,*  
146 *FOLFOX, FOLFIRI, FLOT FOLFOXIRI, ECF we reported the 5-Fluorouracil*  
147 *concentration in the x-axis. Control group showed an alteration from normal*  
148 *phenotype  $\leq 10\%$ . For each chemotherapy regimen a dose-response and the*  
149 *relative linear regression analysis of the normal phenotype and the dead*  
150 *embryos are shown. The resulting R square is reported. The results*  
151 *presented are a pool from three independent biological replicates (n=90).*

152 **Figure 2 Estimation of the maximum tolerated dose.** (A) Table and (B) box  
153 plot displaying EPC/IC50 EPC/LD25 ratios for all chemotherapy protocols.

#### 154 **Zebrafish efficacy study**

155 For the estimation of the equivalent dose, we conducted an *in vivo* efficacy  
156 study based on human cancer cell lines, whose chemosensitivity has been  
157 already characterized in the literature. Specifically, 2 dpf larvae were  
158 xenotransplanted with Dil-stained human colorectal carcinoma cell line (HCT  
159 116) or human pancreatic carcinoma cell line (MIA PaCa-2) into the yolk sac.  
160 To confirm the presence of the xenograft, injected larvae were screened by  
161 fluorescence microscopy 2 hours post injection (hpi). The screened larvae  
162 were randomly distributed in a multiwell plate (1 embryo/well) and equally  
163 divided among groups (control and chemotherapy regimens). In absence of  
164 chemotherapy, the Dil-stained area shows a statistically significant increase  
165 over the time (Figure 3, control group) and the block or the inversion of this  
166 tendency has been considered in the present study as a hallmark of  
167 chemotherapy effect. Indeed, we tested 4 chemotherapy regimens (5-FU,  
168 FOLFOX, FOLFOXIRI, FOLFIRI), which are the standard of care for the



169 treatment of colorectal cancers, on HCT 116 cells xenotransplanted in 2 dpf  
170 larvae. According to the toxicity study, we used conversion factors  $CF > 4.6$ .  
171 First, a  $CF = 8$  was tested but data showed a statistically significant increase of  
172 the Dil-stained area at 1 dpi and 2 dpi for all the regimens, suggesting the  
173 inefficacy of chemotherapy treatment at the CF used (Figure 3A). Therefore,  
174 we tested chemotherapy protocols at a higher concentration, corresponding to  
175  $CF = 5$ . Interestingly, FOLFOXIRI were found to inhibit the increase of the  
176 stained area at 1 dpi and 2 dpi ( $p > 0.05$ ), as opposite to the control, 5-FU,  
177 FOLFOX and FOLFIRI that showed a statistically significant progression  
178 (Figure 3B). The effect of FOLFOXIRI treatment was also confirmed by  
179 quantification of apoptosis in xenotransplanted (Dil-positive) cells revealing a  
180 significant increase of pyknotic nuclei with respect to the control group (no  
181 chemotherapy drugs) (Figure S1A).

182 The next step was to confirm the value of  $CF = 5$  for dose equivalence by  
183 testing its efficacy on a different model, i.e. xenotransplanted larvae receiving  
184 MIA PaCa-2 cell line. Indeed, we tested 4 chemotherapy regimens (GEM,  
185 GEMOX, GEM-Nab, FOLFOXIRI), which are the standard of care for the  
186 treatment of pancreatic cancers, on MIA PaCa-2 cells xenotransplanted in 2  
187 dpf larvae. GEM and GEM-Nab-P proved to be the most efficient regimens,  
188 with no statistically significant increase of the Dil-stained area at 1 dpi and 2  
189 dpi, as opposite to the control, GEMOX and FOLFOXIRI (Figure 3C).

190 **Figure 3 Efficacy analysis.** *Evaluation of the effects of chemotherapy on*  
191 *cancer cell lines (HCT 116, MIA PaCa-2) xenotransplanted in 2dpf zebrafish*  
192 *embryos. Each embryo was imaged at 2 hpi, 1 dpi, 2 dpi and the relative area*  
193 *is the Dil-stained area normalized with respect to the 2 hpi time point. (A)*

194 *Chemosensitivity of HCT 116 xenografts, CF=8. A statistically significant*  
195 *increase of relative area was observed in all groups. (B) Chemosensitivity of*  
196 *HCT 116 xenografts, CF=5. A statistically significant increase of relative area*  
197 *was observed in control, 5-FU, FOLFOX and FOLFIRI but not in FOLFOXIRI.*  
198 *(C) Chemosensitivity of MIA PaCa-2 xenografts, CF=5. A statistically*  
199 *significant increase of relative area was observed in control, GEMOX and*  
200 *FOLFOXIRI treatments but not in GEM and GEM/nab-P. Data are mean  $\pm$*   
201 *SEM and representative of three independent assays.  $n \geq 15$  (embryos), 2-way*  
202 *ANOVA followed by Bonferroni correction (all groups compared against k*  
203 *group). \*  $p < 0.05$ ; \*\*  $p < 0.01$ ; \*\*\*  $p < 0.001$ ; \*\*\*\*  $p < 0.0001$ .*

#### 204 **Zebrafish Avatar**

205 A total of 6 patients operated for adenocarcinoma of the colon (n=3),  
206 pancreatic ductal adenocarcinoma (n=1), and gastric adenocarcinoma (n=2)  
207 have been enrolled in the study (NCT03668418) to establish the zebrafish  
208 Avatar model. In order to preserve the tumor micro-environment, we decided  
209 to xenotransplant fresh tissue fragments screened by the histopathology unity  
210 of the Azienda Ospedaliera Universitaria Pisana, by modifying the protocol  
211 published by Marques *et al.* (12). Briefly, the tissue was DiI/DiO-stained,  
212 disaggregated using Dumont forceps (No.5) into a relative size of  $\frac{1}{2}$ - $\frac{1}{4}$  the  
213 size of the yolk and xenotransplanted in the yolk of 2 dpf larvae. After  
214 transplantation, larvae were incubated for 2 h at 35°C, then screened to check  
215 for presence of the stained tissue and imaged at 2 hpi, 1 dpi and 2 dpi. Cell  
216 engraftment was also confirmed by histological analysis performed at 2 dpi.  
217 Hoechst staining documents healthy cell nuclei (Figure S1B) and H&E  
218 staining shows the presence of cancer cells that have the typical round-shape

219 morphology with large nuclei (Figure S2A). Interestingly, H&E staining  
220 performed on zebrafish embryos xenotransplanted with fragments of normal  
221 tissue taken from normal mucosa or pancreatic parenchyma of the surgical  
222 specimen do not show any cell with typical cancer morphology but exclusively  
223 cells with a typical fibroblast-like shape (Figure S2B). In order to perform the  
224 analysis, we measured the size of the region of interest (ROI) corresponding  
225 to the stained area at 2 hpi, 1 dpi and 2 dpi (Figure 4A3-C3). The mean size  
226 of the tumor mass area measured in each time point was normalized with  
227 respect to the 2 hpi time point. We found an increase of the stained area  
228 versus time in all cases, which was statistically significant at 2 dpi with respect  
229 to the time point 2 hpi for 5 patients of 6 (83%, Figure 5). According to this  
230 finding, the measure of the size of the relative stained area at 2 dpi has been  
231 fixed as primary measure of the study. Sporadically we also detected cancer  
232 cell migration (Figure S3).

233 **Figure 4 A representative larva xenotransplanted with a fresh tumor**  
234 **specimen of gastric cancer (patient S013).** *Bright-field images of the*  
235 *grafted larvae (A1-C1), epi-fluorescence images (A2-C2) and overlay (A3-C3),*  
236 *showing the region of interest (ROI; yellow line). All images are oriented so*  
237 *that rostral end is on the left and dorsal end is on the top.*

238 **Figure 5 Quantitative analysis of six cases of patient-derived tumor**  
239 **xenografts.** *Dil-stained area at time point 2 hpi, 1 dpi and 2 dpi was*  
240 *normalized with respect to the time point 2 hpi. Patient enrollment code is*  
241 *reported (C=Colon, P=Pancreas, S=Stomach) and the number of embryos*  
242 *analyzed for each case study is indicated in the image. Results are expressed*

243 *as mean  $\pm$  SEM. \*  $p < 0.05$ ; \*\*  $p < 0.01$  by 1- way ANOVA followed by*  
244 *Bonferroni correction (1 dpi and 2 dpi compared against 2 hpi).*

#### 245 **Zebrafish trial**

246 24 adult patients with pancreatic cancers (n=12), colon cancer (n=8) and  
247 gastric cancers (n=4) undergoing a chemotherapy treatment have been  
248 recruited for this part of the study. After surgery and histopathology screening,  
249 patient biopsies have been xenotransplanted in 100 zebrafish embryos and  
250 injected embryos were randomly allocated among 5 groups (4 therapeutic  
251 options and one control group). Groups were exposed to all chemotherapy  
252 options, according to the cancer type, by dissolving the chemotherapy in fish  
253 water, according to the equivalent dose corresponding to CF=5. Two days  
254 post treatment the response of zebrafish xenografts to the chemotherapy  
255 options was analyzed by monitoring the ROI size at 2 hpi, 1 dpi and 2 dpi  
256 (Figure S4). The chemotherapy protocols tested were 5-FU, FOLFOX,  
257 FOLFIRI and FOLFOXIRI for colon cancer; GEM, GEMOX, GEM/nab-P and  
258 FOLFOXIRI for pancreatic case and FOLFOX, FOLFIRI, FLOT and ECF for  
259 gastric cancer. We adapted the “Response evaluation criteria in solid tumors  
260 (RECIST)” to the fish trial by defining the partial response (PR, at least a 30%  
261 decrease in the relative stained area at 2 dpi / 2 hpi, taking as reference the  
262 relative stained area at 2 dpi / 2 hpi of the control group) and complete  
263 response (CR, at least a 90% decrease in the relative stained area at 2 dpi / 2  
264 hpi, taking as reference the relative stained area at 2 dpi / 2 hpi of the control  
265 group) (Figure 6). For patients affected by colon cancer, we observed a PR in  
266 62.5% of patients to FOLFOX, FOLFIRI and FOLFOXIRI but a less frequent  
267 response (37.5% of patients) to 5-FU; CR was observed only in a limited

268 number of patients (12.5%) and only to FOLFIRI chemotherapy. For patients  
269 affected by pancreatic cancer, we observed a PR to GEM/nab-P (58.33 % of  
270 patients), GEM (50%), GEMOX (50%), a limited PR to FOLFOXIRI (33.33 %)  
271 but we never observed CR for any chemotherapy treatment. For patients  
272 operated for gastric cancer, we observed high incidence of PR to FOLFIRI  
273 (100% of patients) but low incidence of PR to FOLFOX, FLOT and ECF (25%  
274 of patients); we also observed CR to FOLFIRI in one patient of four.

275 **Figure 6 Percentage of Partial Response (PR) and Complete Response**  
276 **(CR). FOLFOXIRI, FOLFIRI, FOLFOX and 5-FU treatments in Zebrafish**  
277 **Avatar xenotransplanted with colon tumor (n=8 patient case analyzed) (A);**  
278 **GEMOX, GEM/nab-P, GEM, FOLFOXIRI treatments in Zebrafish Avatar**  
279 **xenotransplanted with pancreas tumor (n=12 patient case analyzed) (B); ECF,**  
280 **FLOT, FOLFIRI and FOLFOX treatments in Zebrafish Avatar**  
281 **xenotransplanted with gastric tumor (n=4 patient case analyzed) (C).**

282 Interestingly, the zebrafish Avatar can be used to perform chemosensitivity  
283 assessment on a single patient basis. Four representative case of patient  
284 enrolled in the study are given in Figure 7. As for the two cases of colon  
285 cancer, we could observe significant response ( $p=0.03$ ) to FOLFOXIRI  
286 treatment in patient C024, and to 5-FU ( $p=0.05$ ) and FOLFIRI ( $p=0.02$ ) in  
287 patient C031. As for the two cases of pancreatic cancer, FOLFOXIRI proved  
288 to be the efficient regimen in patient P025 ( $p=0.02$ ) and in patient P030  
289 ( $p=0.04$ ).

290 **Figure 7 Chemosensitivity assay. 48 hpf embryos were injected with**  
291 **fragments of patient's tumor tissue and treated for 48 hours with different**

292 *chemotherapy compounds at the CF=5. Representative cases of colon cancer*  
293 *(patient enrolled code: C024, C031) and pancreatic cancer (patient enrolled*  
294 *code: P025, P030) with quantitative analysis of relative tumor area (2 dpi/2 hpi*  
295 *for colon and 2 dpi/24 hpi for pancreas). All graphs show an increase of the*  
296 *stained area over the time in control group. The cases C024, P025, P030*  
297 *show a statistically significant regression of the stained area size in*  
298 *FOLFOXIRI treated group. The case C031 shows significant stained area*  
299 *reduction in 5-FU and FOLFIRI treated groups. Results are expressed as*  
300 *mean  $\pm$  SEM and analyzed by 1-way ANOVA followed by Dunnett's multiple*  
301 *comparisons test. \*  $p < 0.05$ ,  $n \geq 3$ .*

## 302 DISCUSSION

303 Many studies have demonstrated that preclinical models hold great promise  
304 for the implementation of personalized medicine strategies (16-18). Mouse  
305 Avatar have been proposed and implemented by different research groups,  
306 but still have important practical limitations (2, 19, 20). Zebrafish offers distinct  
307 advantages over the murine-based co-clinical trials because of the relatively  
308 simple, rapid and cost-effective method to establish a human tumor xenograft  
309 model (21). Zebrafish Avatar approach could be used for evaluating individual  
310 patient drug responses in a clinically relevant setting or for the high-  
311 throughput screening of new molecules. Considering the validity of the  
312 Zebrafish Avatar and the affordable costs, the possibility to exploit this model  
313 in clinical practice has emerged. To do that, the equivalent dose conversion  
314 from human to fish need to be identified.

315 In this work, we found a general dose conversion criterion based on the  
316 following formula:

$$317 \quad C_{fish} = \frac{M}{V} / CF \quad \text{Eq.3}$$

318 Where  $c_{fish}$  (mg/ml) is the chemotherapy concentration in fish water,  $M$  is the  
319 total amount (mg) of chemotherapy administered to humans,  $V$  (ml) is the  
320 volume of human plasma and  $CF$  is the conversion factor that we estimated to  
321 be  $CF=5$ . We estimated this value by matching data collected from the safety  
322 and efficacy studies performed in zebrafish. The safety study was performed  
323 on WT larvae. The efficacy study was performed on larvae xenotransplanted  
324 with human cancer cell line whose response to chemotherapy has been  
325 already characterized. Specifically, we found that HCT 116 responded to  
326 FOLFOXIRI treatment with higher sensitivity, but not to 5-FU, FOLFOX and  
327 FOLFIRI at the  $CF$  proposed. These results are concordant with the literature  
328 suggesting that first-line FOLFOXIRI chemotherapy leads to improved survival  
329 and efficacy of metastatic colorectal cancer patient outcomes in comparison  
330 to FOLFIRI or FOLFOX chemotherapy (22). We also tested the response of  
331 MIA PaCa-2 cells by observing high sensitivity to GEM and GEM/nab-P  
332 treatments. This analysis is confirmed by the efficacy data from metastatic  
333 pancreatic cancer patients treated with GEM/nab-P (23). Such experimental  
334 evidences, obtained by testing the efficacy of chemotherapy on two cancer  
335 cell lines from different types of human tumor (colorectal and pancreatic),  
336 suggest that the selected therapeutic dose (corresponding to  $CF=5$ ) is  
337 effective in killing tumor cells and, in principle, predictive of the best  
338 pharmacological treatment. Indeed, we suggest the use of the conversion  
339 factor  $CF=5$  in any co-clinical trial using zebrafish Avatars. This represents a  
340 starting point for any further research step that aims to validate the zebrafish  
341 Avatars as valuable tools to support the oncologists in the clinical routine.

342 Potential applications are the evaluation of the disease prognosis and  
343 chemosensitivity assays for the prediction of the most effective chemotherapy  
344 scheme. Indeed, we validated an approach consisting in the  
345 xenotransplantation of pieces of the patient tumor tissue, after surgery and  
346 histopathology screening, in order to obtain a model for testing the response  
347 of the patient tumor to the different chemotherapy regimens, with an  
348 assessment in less than one week (Figure S4). The xenotransplantation of  
349 cancer cells isolated and propagated from patient tumors in zebrafish is an  
350 approach more popular than the xenotransplantation of tissue fragments.  
351 Unfortunately, isolated cancer cells tend to lose cell heterogeneity and the  
352 stromal contribution. Moreover, during the process of isolation and adaptation,  
353 clones with a higher proliferative rate than that of the primary tumor are  
354 selected and thus they could not be representative of the cancer cell  
355 population (24). Indeed, for precision medicine and personalized medicine,  
356 the xenotransplantation of biopsy or surgical specimen fragments screened by  
357 the pathologist would be recommended to develop patient-derived xenografts  
358 in which the stromal counterpart and cancer cell heterogeneity are both  
359 preserved (25). Our data suggest that fresh tumor tissue transplanted in 2dpf  
360 larvae can engraft and survive in the host, as documented by histological  
361 analysis showing typical cancer cell morphology (H&E staining, Figure S2A)  
362 and absence of pyknotic nuclei (Hoechst staining, Figure S1B). The survival  
363 rate of the xenografted host was acceptable, at both 1 dpi (81%, n=101) and  
364 at 2 dpi (68%, n=101). We also detected the capacity of cancer cell  
365 extravasion and dissemination in distal tissues (Figure S3). As the relative  
366 area at 2 dpi/2 hpi has been fixed as primary measure of the study, we



367 performed the efficacy tests under the assumption that a statistically  
368 significant decrease of this measure with respect to control group (no  
369 chemotherapy) is a hallmark of chemotherapy response. Specifically, we  
370 tested chemosensitivity in 24 human tumor fragments taken from surgical  
371 specimen. To this purpose, pieces of tumor tissue were microinjected in  
372 zebrafish embryos to create Zebrafish Avatar and treated with chemotherapy  
373 drugs at a concentration corresponding to  $CF=5$ . Interestingly, our  
374 experimental data have shown good agreement with observations registered  
375 in the common clinical practice. In fact, for patients affected by colon cancer  
376 (Figure 6A), we found a superiority of the chemotherapy treatment when a  
377 combination of drugs are used (FOLFOX, FOLFIRI and FOLFOXIRI) respect  
378 to the use of only 5-FU (26). Additionally, we found a similar response to  
379 FOLFOX and FOLFIRI (27). The higher aggressiveness of pancreatic cancers  
380 associated with a lower response to chemotherapy compared to colon and  
381 gastric cancers may be the reason why a complete response was never  
382 observed in our experiments for this group of patients (Figure 6B). For the  
383 group of patients affected by gastric cancer (Figure 6C), we found an  
384 excellent response to FOLFIRI that can be considered an acceptable first-line  
385 treatment for advanced gastric cancers (28).

386 Interestingly, the use of zebrafish Avatars allows to appreciate a different  
387 response to different chemotherapy regimens on a single-patient basis  
388 (Figure 7). Further tests will be necessary to fully validate the zebrafish Avatar  
389 here proposed as a clinical tool predictive of the most effective treatment for  
390 each patient. Future experiments will be devoted to enroll in the study a  
391 higher number of cases in order to correlate the chemosensitivity results

392 obtained in the animal trial with the response to the chemotherapy treatment  
393 observed in the human trial.

## 394 MATERIALS AND METHODS

### 395 *Zebrafish husbandry*

396 Zebrafish (*Danio rerio*) were handled in compliance with local animal welfare  
397 regulations (authorization n. 99/2012-A, 19.04.2012; authorization for  
398 zebrafish breeding for scientific purposes released by the “Comune di Pisa”  
399 DN-16/43, 19/01/2015) and standard protocols approved by Italian Ministry of  
400 Public Health, in conformity with the Directive 2010/63/EU. Zebrafish fertilized  
401 eggs were obtained by natural mating of *wild-type* fishes at our facilities and  
402 the developing embryos were staged in incubator at 28°C according to  
403 Kimmel *et al.* (29). Before any procedure, embryos were anesthetized in  
404 0.02% tricaine.

### 405 *Cell culture, staining and microinjections*

406 The HCT 116 human colorectal carcinoma cells were cultured in McCoy's 5A  
407 Modified Medium supplemented with 10% fetal bovine serum (FBS), 10000  
408 U/ml penicillin and 100 µg/ml streptomycin. The Mia Paca-2 human pancreatic  
409 carcinoma cells were cultured in DMEM supplemented with 10% FBS, 10000  
410 U/ml penicillin and 100 µg/ml streptomycin. Cells were incubated at 37°C with  
411 5% of CO<sub>2</sub> in humidified atmosphere. Cells were detached at 80% confluence  
412 with 0.25% (w/v) trypsin- 0.53 mM EDTA solution and stained with 10 µg/ml  
413 CM-Dil for 15 min at 37°C followed by 15 min on ice in darkness. Cells were  
414 washed and centrifuged three times by D-PBS and resuspended in D-PBS  
415 supplemented with 10% FBS to a final concentration of 100 cells/nl. All the

416 reagents were supplemented by Thermo Fisher Scientific, Waltham, MA.  
417 Dechorionated embryos at 2 days post fertilization (dpf) were anesthetized  
418 and injected with four nanoliters of cells suspension in the left side of the  
419 perivitelline space using a heat-pulled needle and the PV830 Pneumatic  
420 PicoPump microinjector. The embryos were incubated at 35°C, and one hours  
421 after injection were screened with fluorescence microscope.

#### 422 *Human tissue preparation and transplantation into zebrafish embryos*

423 The clinical study was approved by the "Comitato Etico Regionale per la  
424 Sperimentazione Clinica della Toscana - sezione AREA VASTA NORD  
425 OVEST" (09/11/2017, prot n 70213). Human material from surgical resected  
426 specimens was obtained from the Azienda Ospedaliera Pisana (Pisa, Italy)  
427 after written informed consent of the patients and approval of local Ethical  
428 Committee. Tumor tissue screened by the histopathologist (from  
429 Histopathology unit, Cisanello facility) was washed three times with RPMI  
430 supplemented with 10000 U/ml penicillin, 100 µg/ml streptomycin and 100  
431 µg/ml Amphotericin and cut into small pieces (1-3 mm) using a scalp blade.  
432 The pieces were then transferred to a 5 ml tube, and stained with either 40  
433 µg/ml DiO in D-PBS (in case of esophageal and gastric cancers) or 40 µg/ml  
434 CM-Dil in D-PBS (in case of hepato-biliary-pancreatic cancers and intestinal  
435 cancers). The tissue pieces were incubated for 15 min at 37°C and 15 min in  
436 ice cube. Tissue pieces were then washed and centrifuged three times by D-  
437 PBS and resuspended in D-PBS supplemented with 10% FBS. For tissue  
438 transplantation we used the manual method proposed by Marques *et al.* 2009  
439 (12). In particular before transplantation, small pieces of stained tissue were  
440 further disaggregated using Dumont forceps (No.5) into a relative size of 1/4

441 to 1/2 the size of the yolk. Tissue pieces with the correct size were transferred  
442 to 1% agarose disks in multiwell plates in which the 2 dpf embryos were  
443 laying, ready for transplantation. A glass transplantation needle was used to  
444 transfer the tissue into the yolk. The tissue was picked up, put on top of the  
445 yolk and then pushed inside. The yolk usually sealed itself and in the majority  
446 of embryos, the tumor remained in the yolk. After transplantation, embryos  
447 were incubated for 2 h at 35°C, then embryos were checked for presence of  
448 tissue and incubated at 35°C in E3 supplemented with 10000 U/ml penicillin  
449 and 100 µg/ml streptomycin with the presence or absence of drugs for the  
450 following days in the respect of the treatment plan.

#### 451 *Anticancer drugs toxicity and treatment plan*

452 Groups of 30 embryos (2 dpf) arrayed in multiwell plates were exposed to E3  
453 supplemented with 10000 U/ml penicillin and 100 µg/ml streptomycin  
454 unmodified (control) and modified with the chemotherapy drug at 35°C for 24h  
455 added with increasing concentrations (Tables S1, S2).

456 The drugs were refreshed each day for the three days of treatment plan. 3  
457 days after treatment (3 dpt) zebrafish larvae were fixed in 4%  
458 paraformaldehyde in PBS at 4°C over night. After that, they were dehydrated  
459 with increasing concentration of ethanol, and analyzed by stereo microscope  
460 to evaluate the phenotype (normal, death, aberrant).

#### 461 *Microscopy and efficacy evaluation*

462 Two hours post injection (2 hpi) zebrafish embryos xenotransplanted with  
463 cancer cell lines were anesthetized with 0.02% tricaine and positioned  
464 laterally, with the site of the implantation to the top. The embryos were imaged

465 by fluorescence microscope and transferred to a 24-well plate (one  
466 embryo/well) containing chemotherapy compounds in E3 supplemented with  
467 10000 U/ml penicillin and 100 µg/ml streptomycin or E3 supplemented with  
468 10000 U/ml penicillin and 100 µg/ml streptomycin unmodified (control). All  
469 embryos were imaged everyday during the time course of the treatment. The  
470 size of the tumor area was measured by using ImageJ.

#### 471 *Histopathology*

472 At 2 dpi (4 dpf) the xenografted larvae were fixed in 4% paraformaldehyde for  
473 1h at room temperature, followed by paraffin embedding for hematoxylin &  
474 eosin staining or OCT embedding for Hoechst staining. Larvae were  
475 respectively sectioned with microtome or cryostat, along the sagittal plane at a  
476 thickness of 8 µm.

477 Histopathological analysis was performed on paraffin sections stained by  
478 hematoxylin & eosin (Merck KGaA, Germany) and digitally imaged using  
479 Nikon Eclipse E600 microscope.

480 Cryostat sections were Hoechst 33342 counterstained. Digital images of the  
481 stained sections were generated using a Nikon Eclipse Ti. Pyknotic cells was  
482 counted at 40 X magnification within the epifluorescence DAPI image.

#### 483 *Statistical analysis*

484 We used GraphPad Prism 7 as statistical analysis software. Data analysis  
485 was performed by ANOVA, followed by Bonferroni correction or Dunnett's  
486 post-hoc test or t-test. Statistical significance was set to 5%.

#### 487 ACKNOWLEDGMENT

488 The authors thank Ida Montesanti and Noemi Nardillo for supporting zebrafish

489 imaging and Dr Martina Giannaccini for the experimental advices. This work  
490 was supported by Fondazione Pisa (project 114/16).

## 491 REFERENCES

- 492 1. Millner LM, Strotman LN. The Future of Precision Medicine in Oncology.  
493 Clinics in laboratory medicine. 2016 Sep;36(3):557-73. PubMed PMID: 27514468.
- 494 2. Hidalgo M, Amant F, Biankin AV, Budinska E, Byrne AT, Caldas C, et al.  
495 Patient-derived xenograft models: an emerging platform for translational cancer  
496 research. Cancer discovery. 2014 Sep;4(9):998-1013. PubMed PMID: 25185190.  
497 Pubmed Central PMCID: 4167608.
- 498 3. Clohessy JG, Pandolfi PP. Mouse hospital and co-clinical trial project--from  
499 bench to bedside. Nature reviews Clinical oncology. 2015 Aug;12(8):491-8. PubMed  
500 PMID: 25895610.
- 501 4. Malaney P, Nicosia SV, Dave V. One mouse, one patient paradigm: New  
502 avatars of personalized cancer therapy. Cancer letters. 2014 Mar 1;344(1):1-12.  
503 PubMed PMID: 24157811. Pubmed Central PMCID: 4092874.
- 504 5. Schmidt C. New mouse models mimic biology of human cancer. J Natl  
505 Cancer Inst. 2015;107(2). PubMed PMID: Medline:25677039. English.
- 506 6. Tentler JJ, Tan AC, Weekes CD, Jimeno A, Leong S, Pitts TM, et al. Patient-  
507 derived tumour xenografts as models for oncology drug development. Nature reviews  
508 Clinical oncology. 2012 Apr 17;9(6):338-50. PubMed PMID: 22508028. Pubmed  
509 Central PMCID: 3928688.
- 510 7. Teng Y, Xie X, Walker S, White DT, Mumm JS, Cowell JK. Evaluating human  
511 cancer cell metastasis in zebrafish. BMC cancer. 2013 Oct 4;13:453. PubMed PMID:  
512 24089705. Pubmed Central PMCID: 3852235.
- 513 8. Giannaccini M, Cuschieri A, Dente L, Raffa V. Non-mammalian vertebrate  
514 embryos as models in nanomedicine. Nanomedicine : nanotechnology, biology, and  
515 medicine. 2014 May;10(4):703-19. PubMed PMID: 24103306.
- 516 9. Lee LM, Seftor EA, Bonde G, Cornell RA, Hendrix MJ. The fate of human  
517 malignant melanoma cells transplanted into zebrafish embryos: assessment of  
518 migration and cell division in the absence of tumor formation. Developmental  
519 dynamics : an official publication of the American Association of Anatomists. 2005  
520 Aug;233(4):1560-70. PubMed PMID: 15968639.
- 521 10. Jackson SJ, Thomas GJ. Human tissue models in cancer research: looking  
522 beyond the mouse. Disease models & mechanisms. 2017 Aug 1;10(8):939-42.  
523 PubMed PMID: 28768734. Pubmed Central PMCID: 5560067.
- 524 11. Barriuso J, Nagaraju R, Hurlstone A. Zebrafish: a new companion for  
525 translational research in oncology. Clinical cancer research : an official journal of the  
526 American Association for Cancer Research. 2015 Mar 1;21(5):969-75. PubMed  
527 PMID: 25573382. Pubmed Central PMCID: 5034890.

- 528 12. Marques IJ, Weiss FU, Vlecken DH, Nitsche C, Bakkers J, Lagendijk AK, et  
529 al. Metastatic behaviour of primary human tumours in a zebrafish xenotransplantation  
530 model. *BMC cancer*. 2009 Apr 28;9:128. PubMed PMID: 19400945. Pubmed Central  
531 PMCID: 2697170.
- 532 13. Haldi M, Ton C, Seng WL, McGrath P. Human melanoma cells transplanted  
533 into zebrafish proliferate, migrate, produce melanin, form masses and stimulate  
534 angiogenesis in zebrafish. *Angiogenesis*. 2006;9(3):139-51. PubMed PMID:  
535 17051341.
- 536 14. Fior R, Pova V, Mendes RV, Carvalho T, Gomes A, Figueiredo N, et al.  
537 Single-cell functional and chemosensitive profiling of combinatorial colorectal therapy  
538 in zebrafish xenografts. *Proceedings of the National Academy of Sciences of the*  
539 *United States of America*. 2017 Sep 26;114(39):E8234-E43. PubMed PMID:  
540 28835536. Pubmed Central PMCID: 5625889.
- 541 15. Nair AB, Jacob S. A simple practice guide for dose conversion between  
542 animals and human. *Journal of basic and clinical pharmacy*. 2016 Mar;7(2):27-31.  
543 PubMed PMID: 27057123. Pubmed Central PMCID: 4804402.
- 544 16. Braekeveldt N, Bexell D. Patient-derived xenografts as preclinical  
545 neuroblastoma models. *Cell and tissue research*. 2018 May;372(2):233-43. PubMed  
546 PMID: 28924803. Pubmed Central PMCID: 5915499.
- 547 17. Mery B, Rancoule C, Guy JB, Espenel S, Wozny AS, Battiston-Montagne P,  
548 et al. Preclinical models in HNSCC: A comprehensive review. *Oral oncology*. 2017  
549 Feb;65:51-6. PubMed PMID: 28109468.
- 550 18. Krempley BD, Yu KH. Preclinical models of pancreatic ductal  
551 adenocarcinoma. *Chinese clinical oncology*. 2017 Jun;6(3):25. PubMed PMID:  
552 28705002.
- 553 19. Gengenbacher N, Singhal M, Augustin HG. Preclinical mouse solid tumour  
554 models: status quo, challenges and perspectives. *Nature reviews Cancer*. 2017  
555 Dec;17(12):751-65. PubMed PMID: 29077691.
- 556 20. Day CP, Merlino G, Van Dyke T. Preclinical mouse cancer models: a maze of  
557 opportunities and challenges. *Cell*. 2015 Sep 24;163(1):39-53. PubMed PMID:  
558 26406370. Pubmed Central PMCID: 4583714.
- 559 21. Taylor AM, Zon LI. Zebrafish tumor assays: the state of transplantation.  
560 *Zebrafish*. 2009 Dec;6(4):339-46. PubMed PMID: 20047467. Pubmed Central  
561 PMCID: 2809423.
- 562 22. Marques RP, Duarte GS, Sterrantino C, Pais HL, Quintela A, Martins AP, et  
563 al. Triplet (FOLFOXIRI) versus doublet (FOLFOX or FOLFIRI) backbone  
564 chemotherapy as first-line treatment of metastatic colorectal cancer: A systematic  
565 review and meta-analysis. *Critical reviews in oncology/hematology*. 2017 Oct;118:54-  
566 62. PubMed PMID: 28917269.
- 567 23. Tehfe M, Dowden S, Kennecke H, El-Maraghi R, Lesperance B, Couture F, et  
568 al. nab-Paclitaxel Plus Gemcitabine Versus Gemcitabine in Patients with Metastatic  
569 Pancreatic Adenocarcinoma: Canadian Subgroup Analysis of the Phase 3 MPACT  
570 Trial. *Advances in therapy*. 2016 May;33(5):747-59. PubMed PMID: 27085323.  
571 Pubmed Central PMCID: 4882352.



- 572 24. Barriuso J, Nagaraju R, Hurlstone A. Zebrafish: a new companion for  
573 translational research in oncology. *Clinical cancer research : an official journal of the*  
574 *American Association for Cancer Research*. 2015;21(5):969-75. PubMed PMID:  
575 Medline:25573382. English.
- 576 25. Mercatali L, La Manna F, Groenewoud A, Casadei R, Recine F, Miserocchi G,  
577 et al. Development of a Patient-Derived Xenograft (PDX) of Breast Cancer Bone  
578 Metastasis in a Zebrafish Model. *Int J Mol Sci*. 2016;17(8). PubMed PMID:  
579 Medline:27556456. English.
- 580 26. Giacchetti S, Perpoint B, Zidani R, Le Bail N, Faggiuolo R, Focan C, et al.  
581 Phase III multicenter randomized trial of oxaliplatin added to chronomodulated  
582 fluorouracil-leucovorin as first-line treatment of metastatic colorectal cancer. *Journal*  
583 *of clinical oncology : official journal of the American Society of Clinical Oncology*.  
584 2000 Jan;18(1):136-47. PubMed PMID: 10623704.
- 585 27. Tournigand C, Andre T, Achille E, Lledo G, Flesh M, Mery-Mignard D, et al.  
586 FOLFIRI followed by FOLFOX6 or the reverse sequence in advanced colorectal  
587 cancer: a randomized GERCOR study. *Journal of clinical oncology : official journal of*  
588 *the American Society of Clinical Oncology*. 2004;22(2):229-37. PubMed PMID:  
589 Medline:14657227. English.
- 590 28. Guimbaud R, Louvet C, Ries P, Ychou M, Maillard E, Andre T, et al.  
591 Prospective, randomized, multicenter, phase III study of fluorouracil, leucovorin, and  
592 irinotecan versus epirubicin, cisplatin, and capecitabine in advanced gastric  
593 adenocarcinoma: a French intergroup (Federation Francophone de Cancerologie  
594 Digestive, Federation Nationale des Centres de Lutte Contre le Cancer, and Groupe  
595 Cooperateur Multidisciplinaire en Oncologie) study. *Journal of clinical oncology :*  
596 *official journal of the American Society of Clinical Oncology*. 2014 Nov 1;32(31):3520-  
597 6. PubMed PMID: 25287828.
- 598 29. Kimmel CB, Ballard WW, Kimmel SR, Ullmann B, Schilling TF. Stages of  
599 embryonic development of the zebrafish. *Developmental dynamics : an official*  
600 *publication of the American Association of Anatomists*. 1995 Jul;203(3):253-310.  
601 PubMed PMID: 8589427.  
602  
603



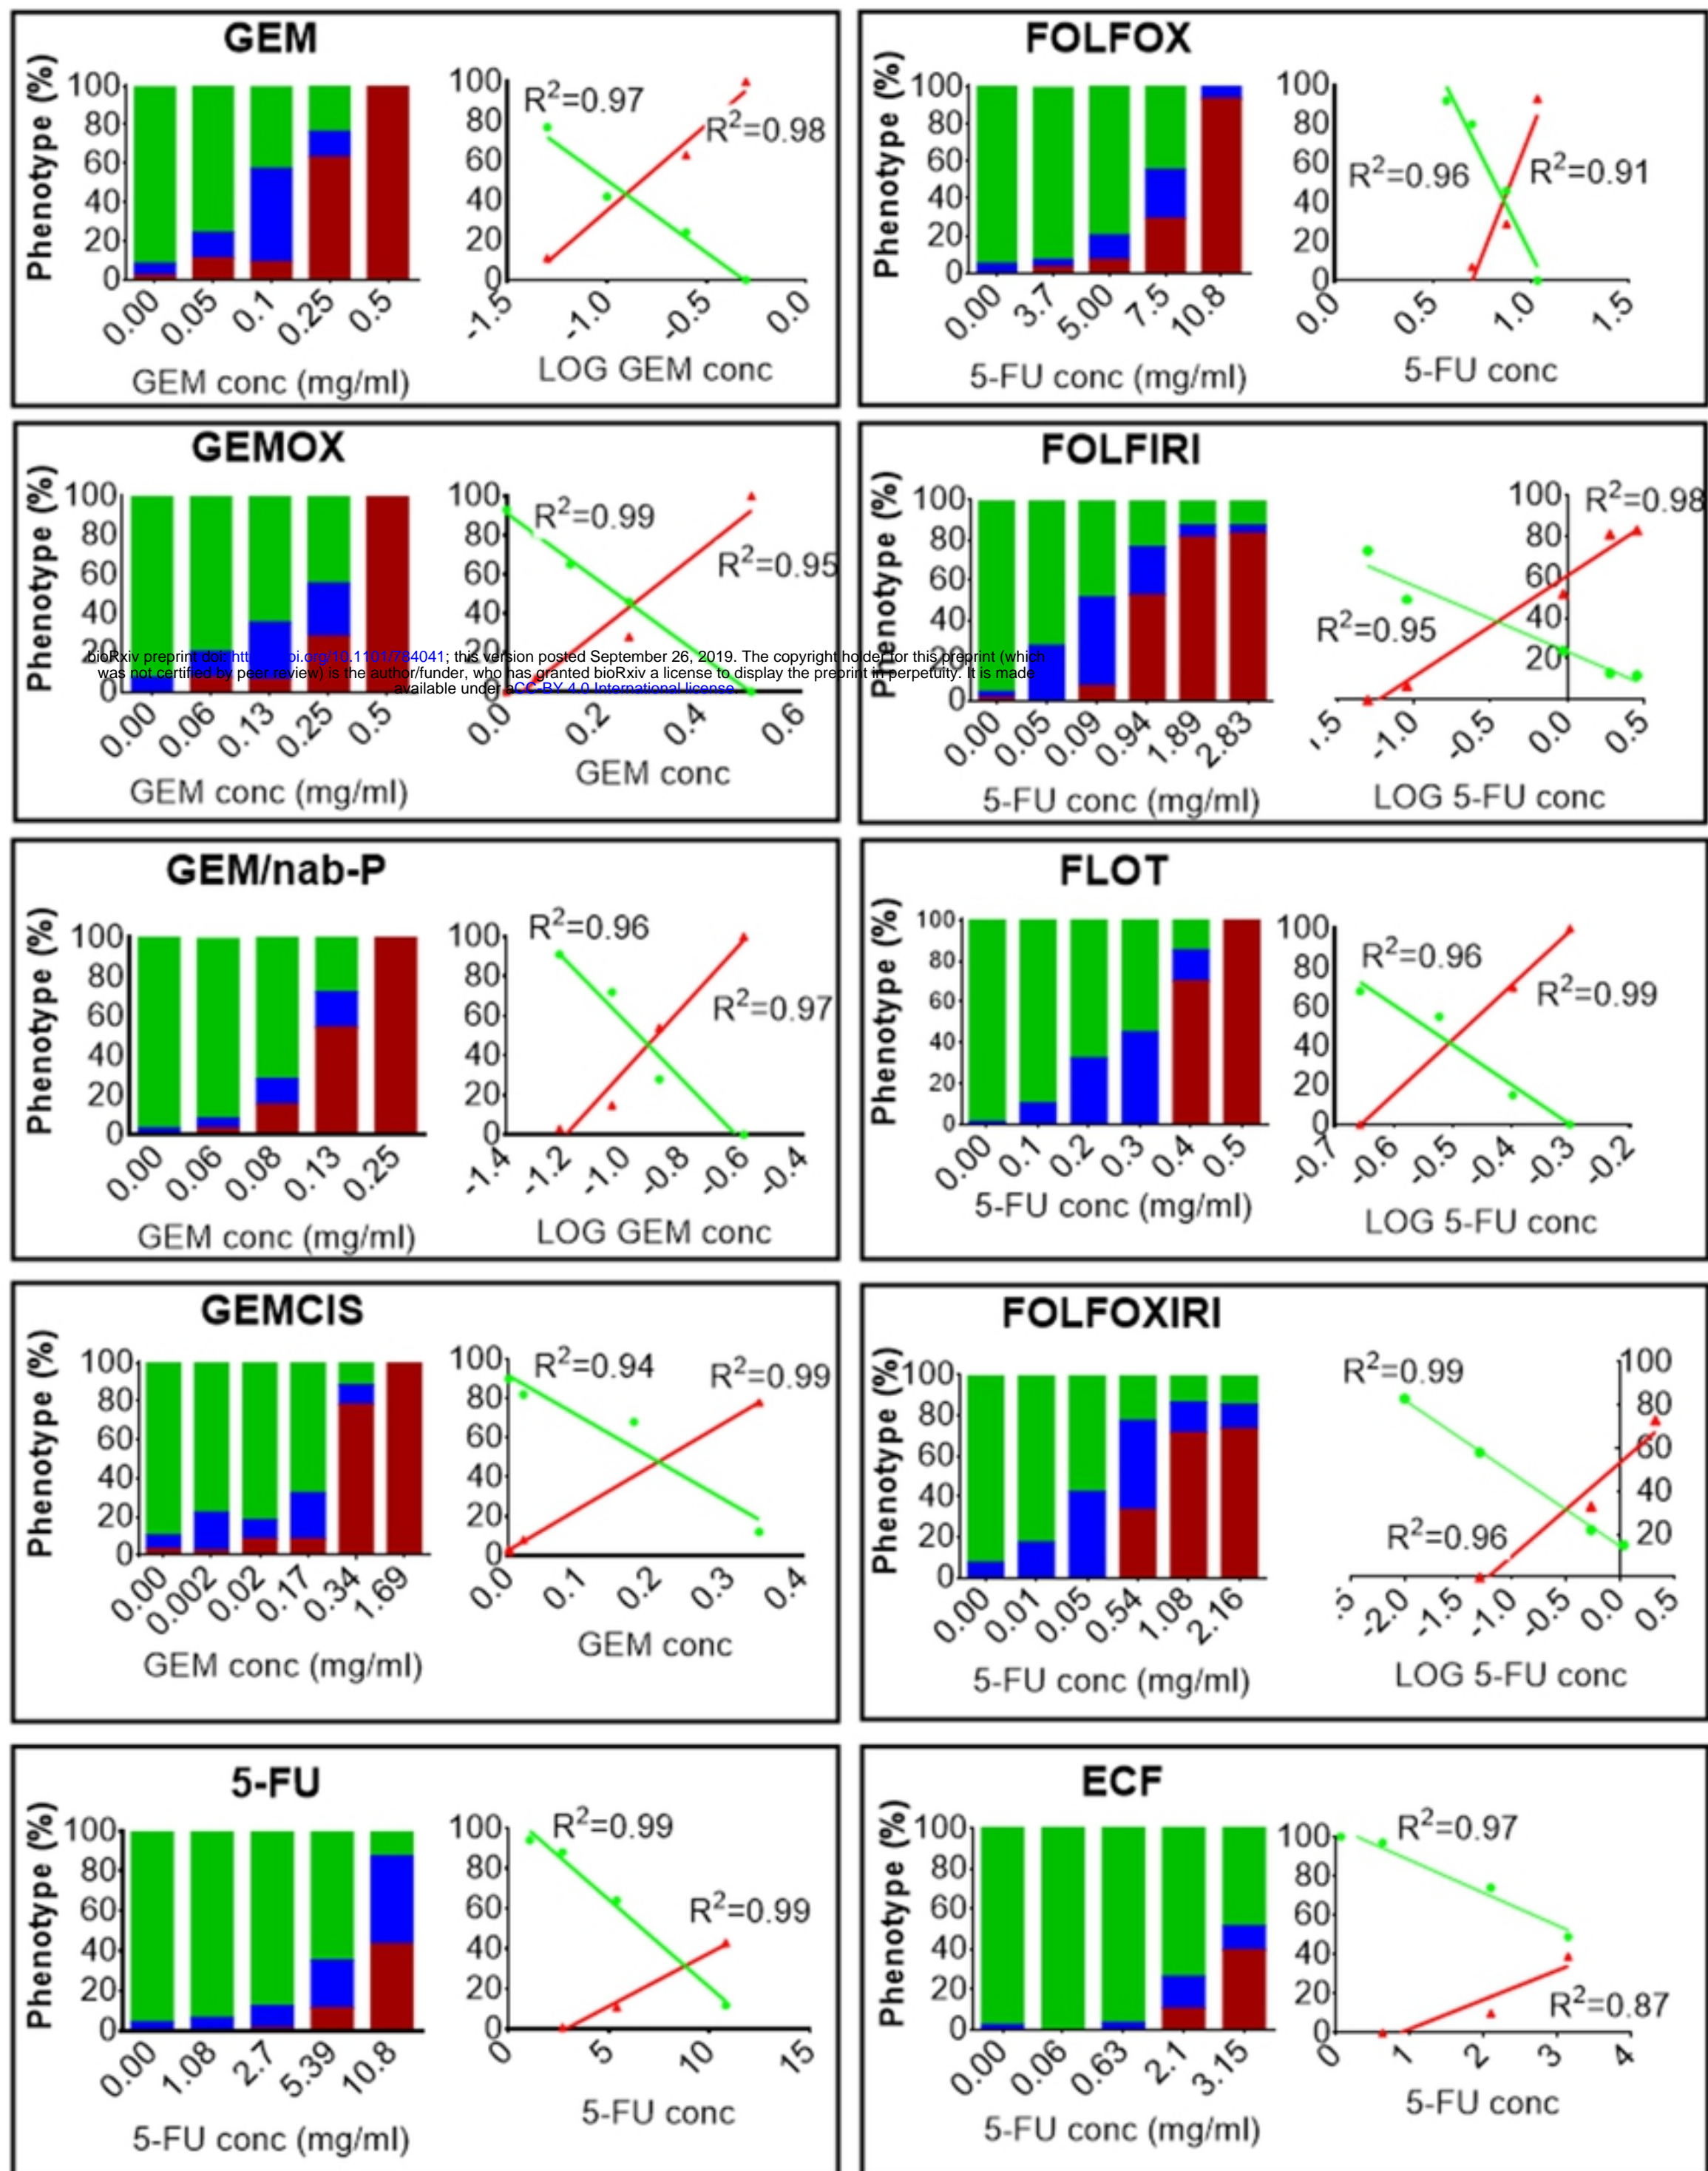

Figure 1

**A**

| Protocol  | EPC / IC50 | EPC / LD25 |
|-----------|------------|------------|
| GEM       | 3,35       | 4,41       |
| GEMOX     | 1,5        | 2,13       |
| GEM/nab-P | 3,03       | 3,77       |
| GEMCIS    | 1,73       | 3,35       |
| 5-FU      | 0,16       | 0,14       |
| FOLFOX    | 0,14       | 0,15       |
| FOLFIRI   | 6,21       | 5,03       |
| FLOT      | 3,08       | 3,23       |
| FOLFOXIRI | 11,99      | 5,55       |
| FCE       | 0,29       | 0,37       |

**B**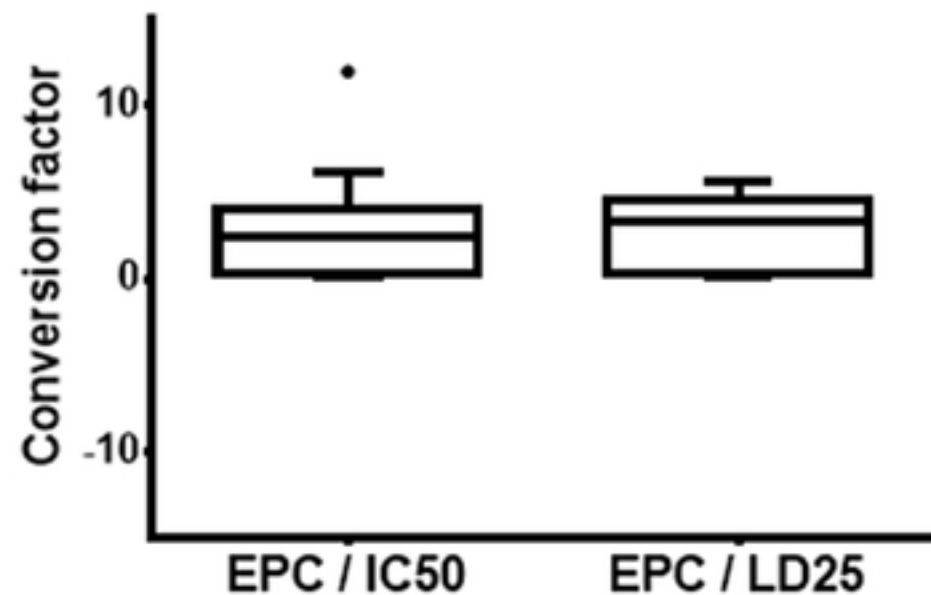

Figure 2

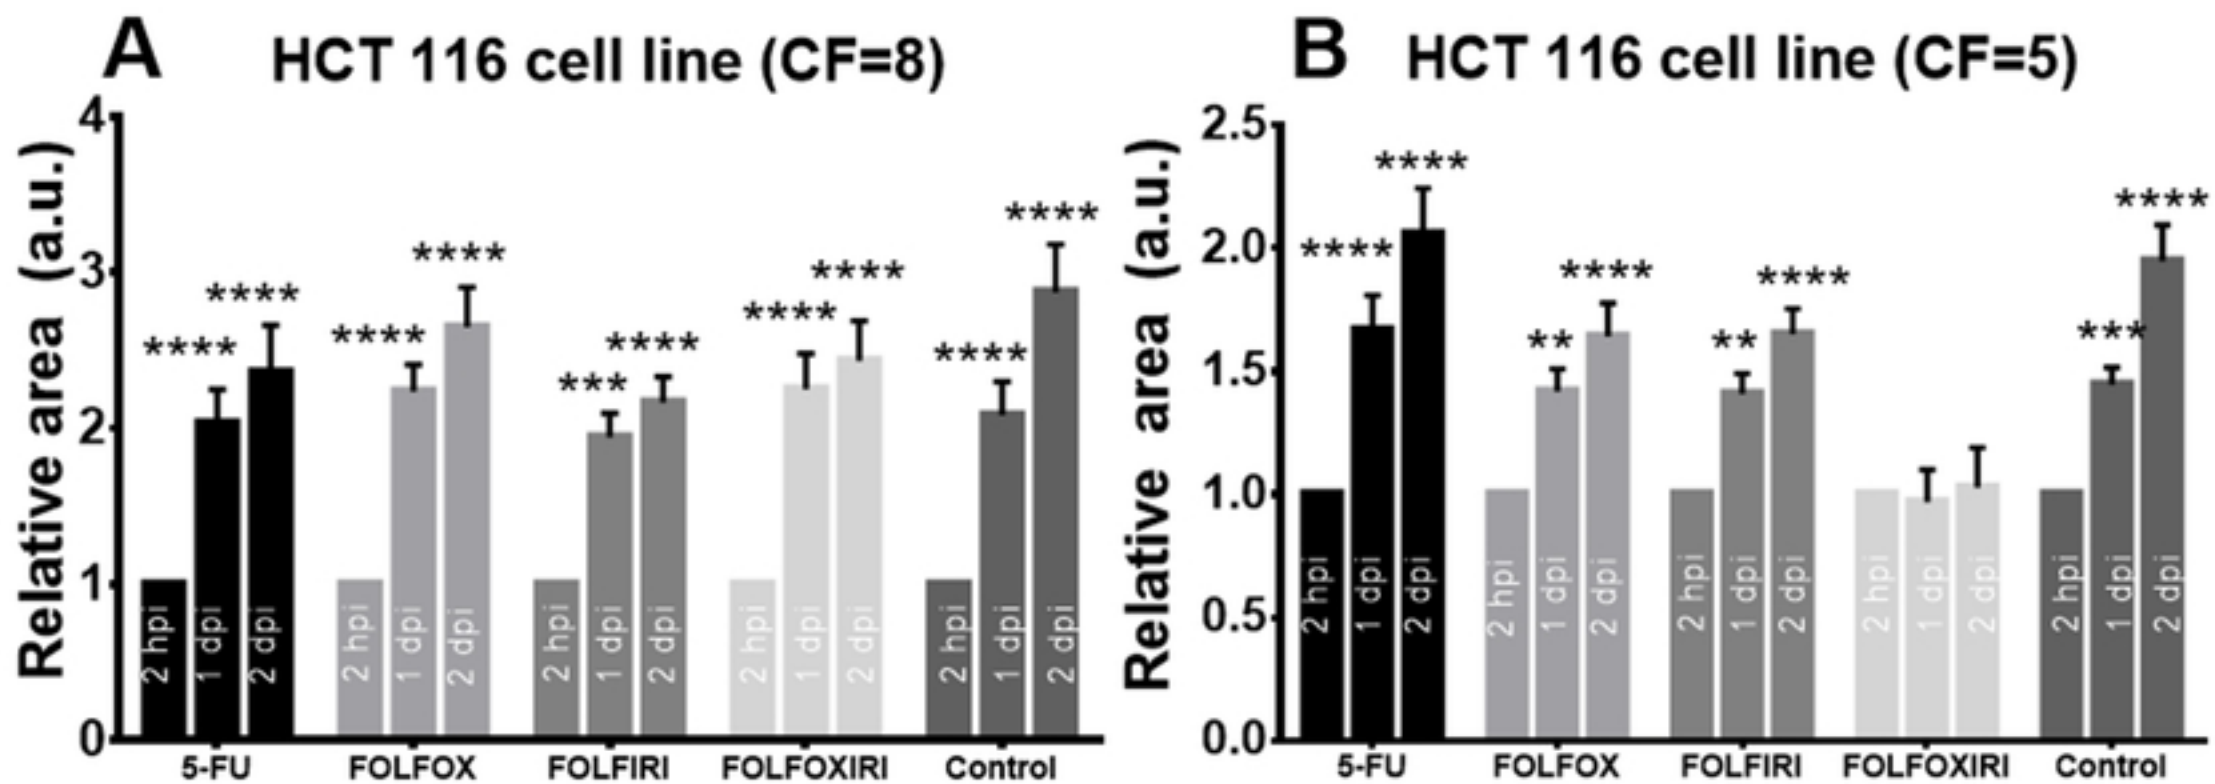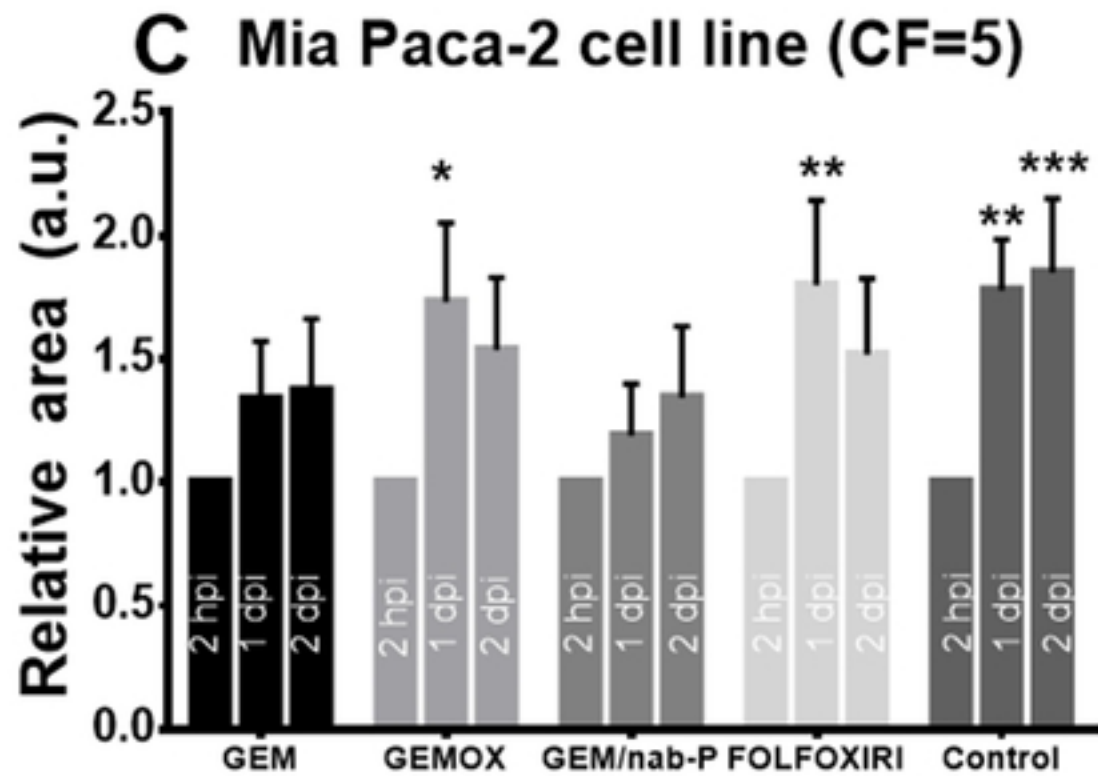

Figure 3



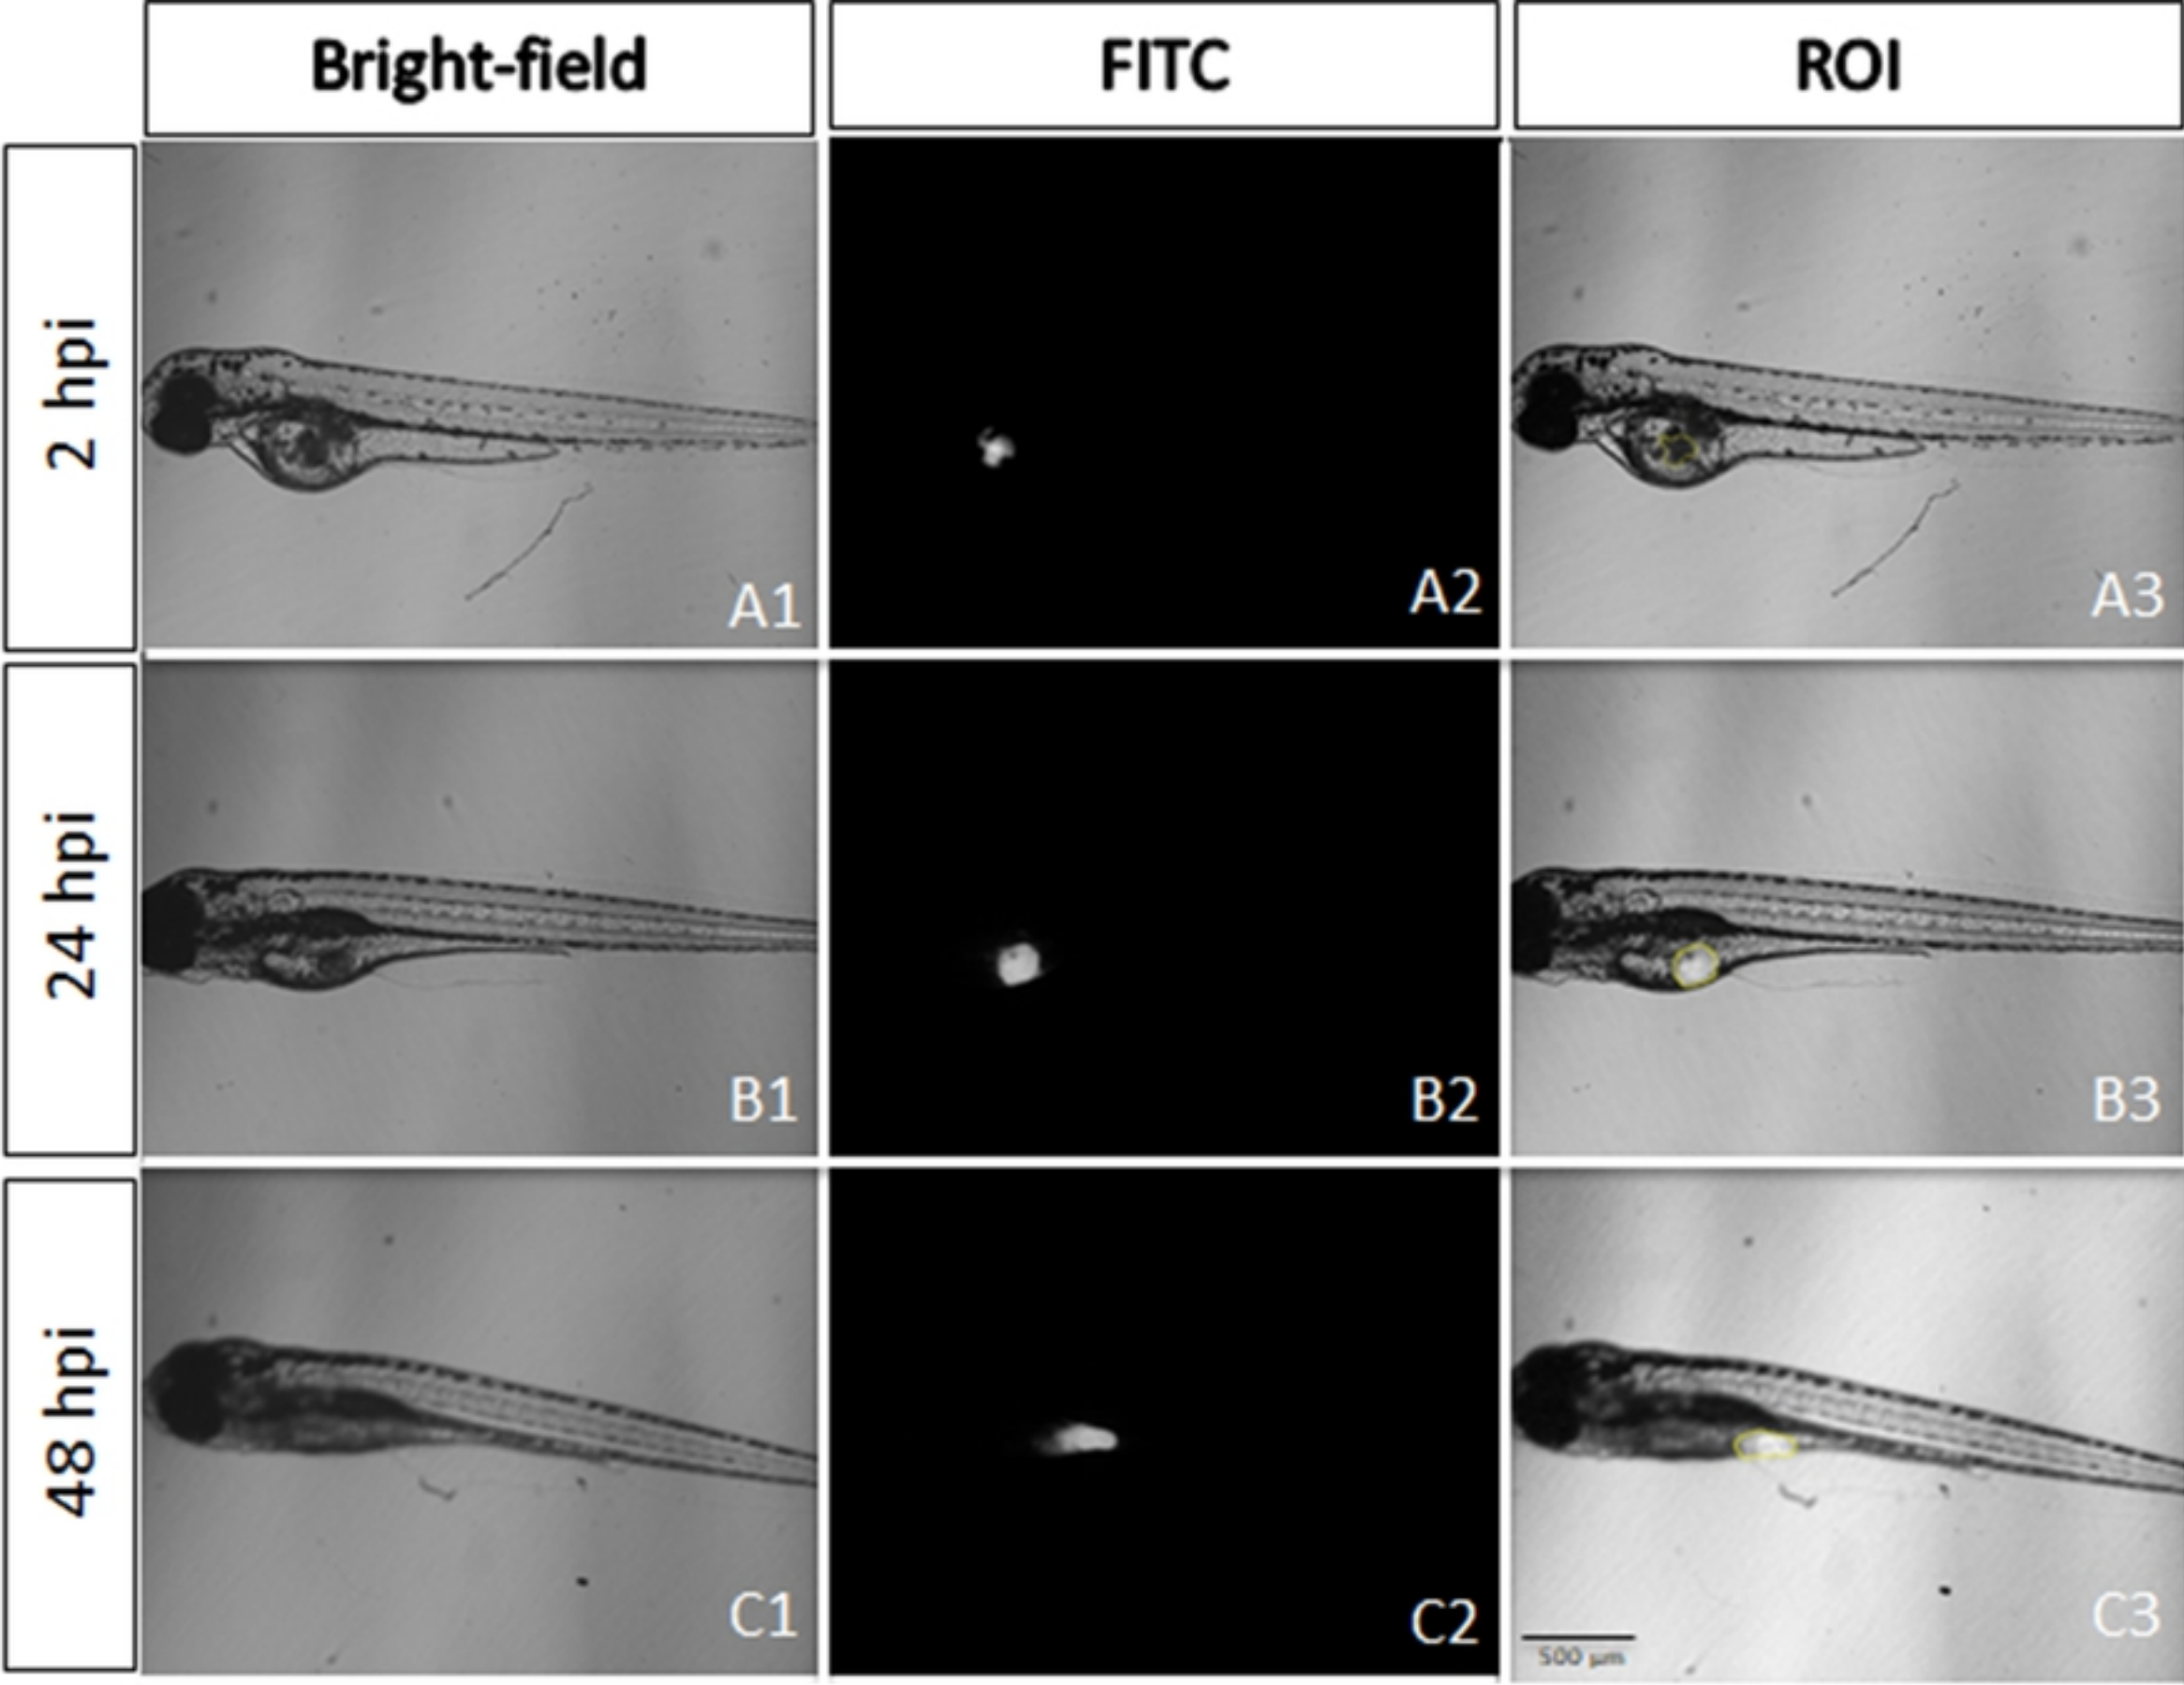

Figure 4

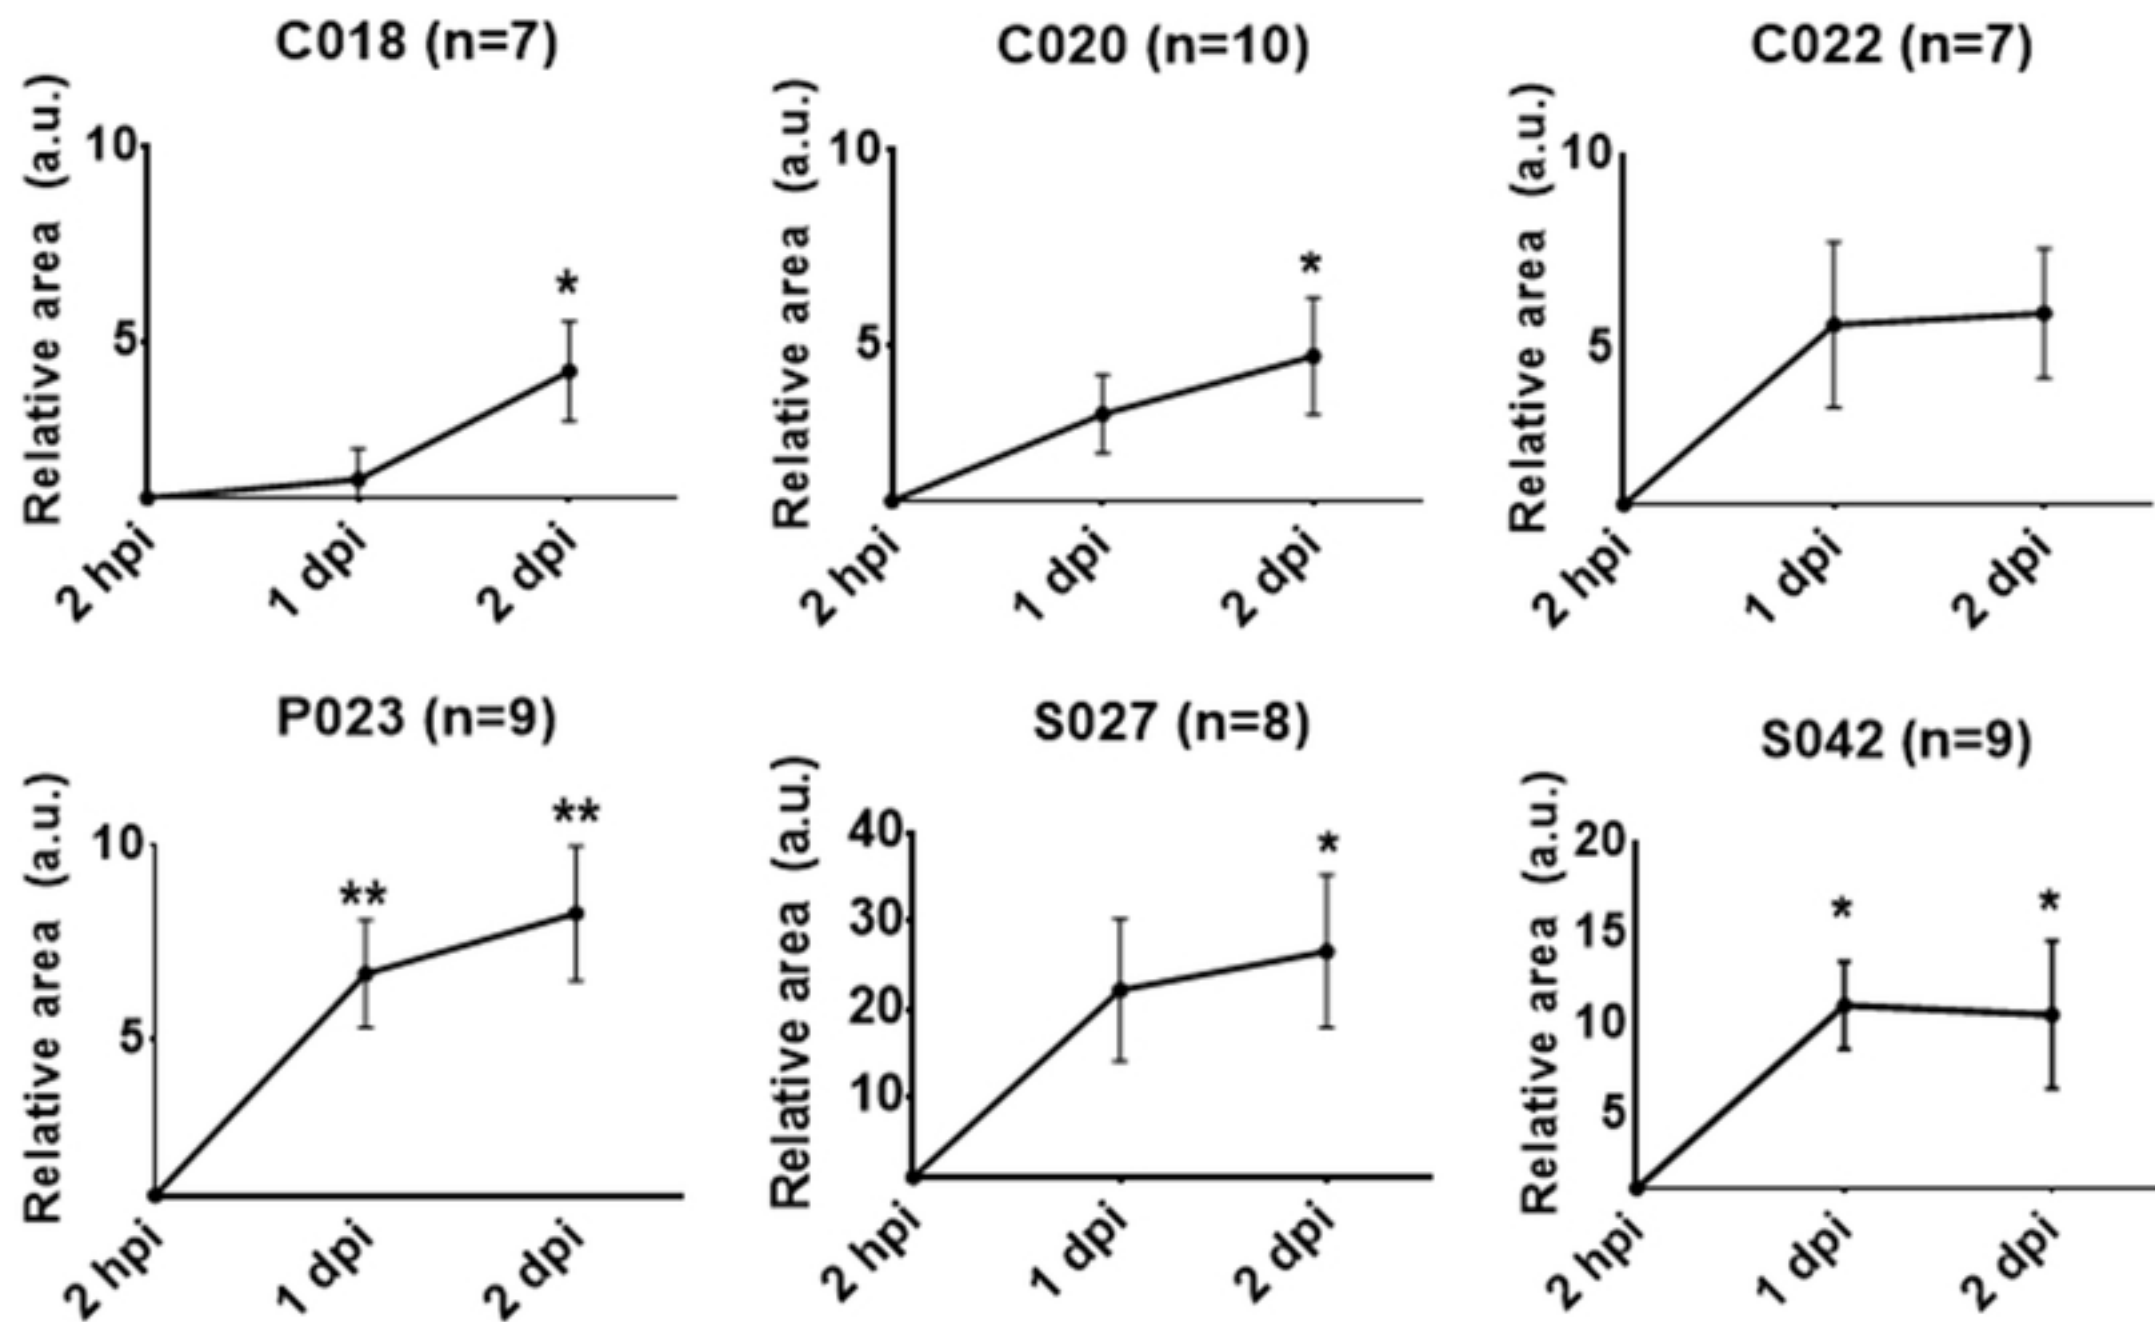

Figure 5

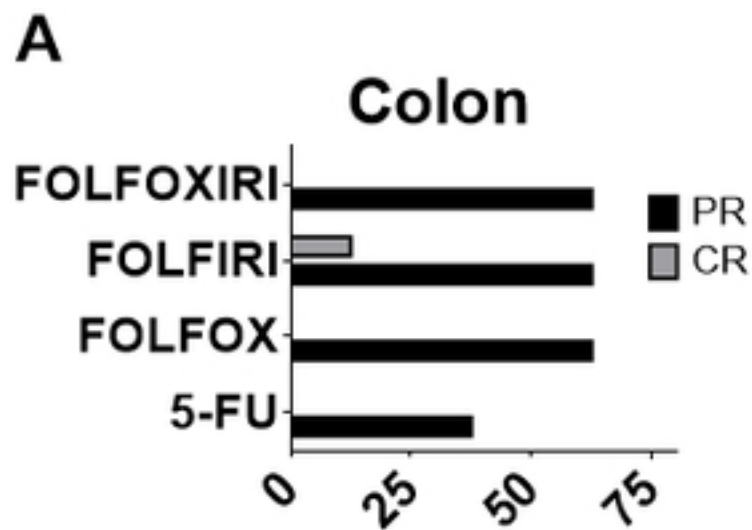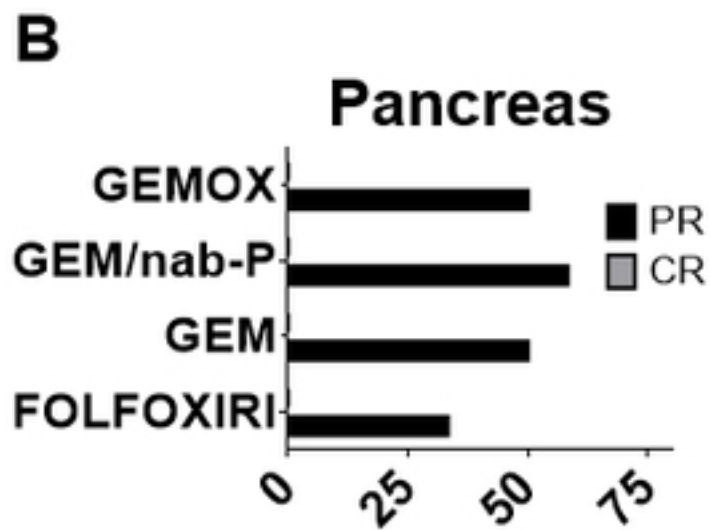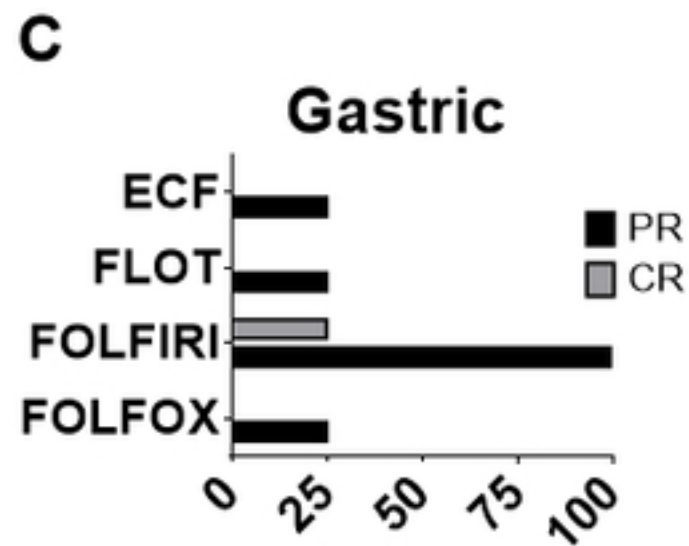

Figure 6

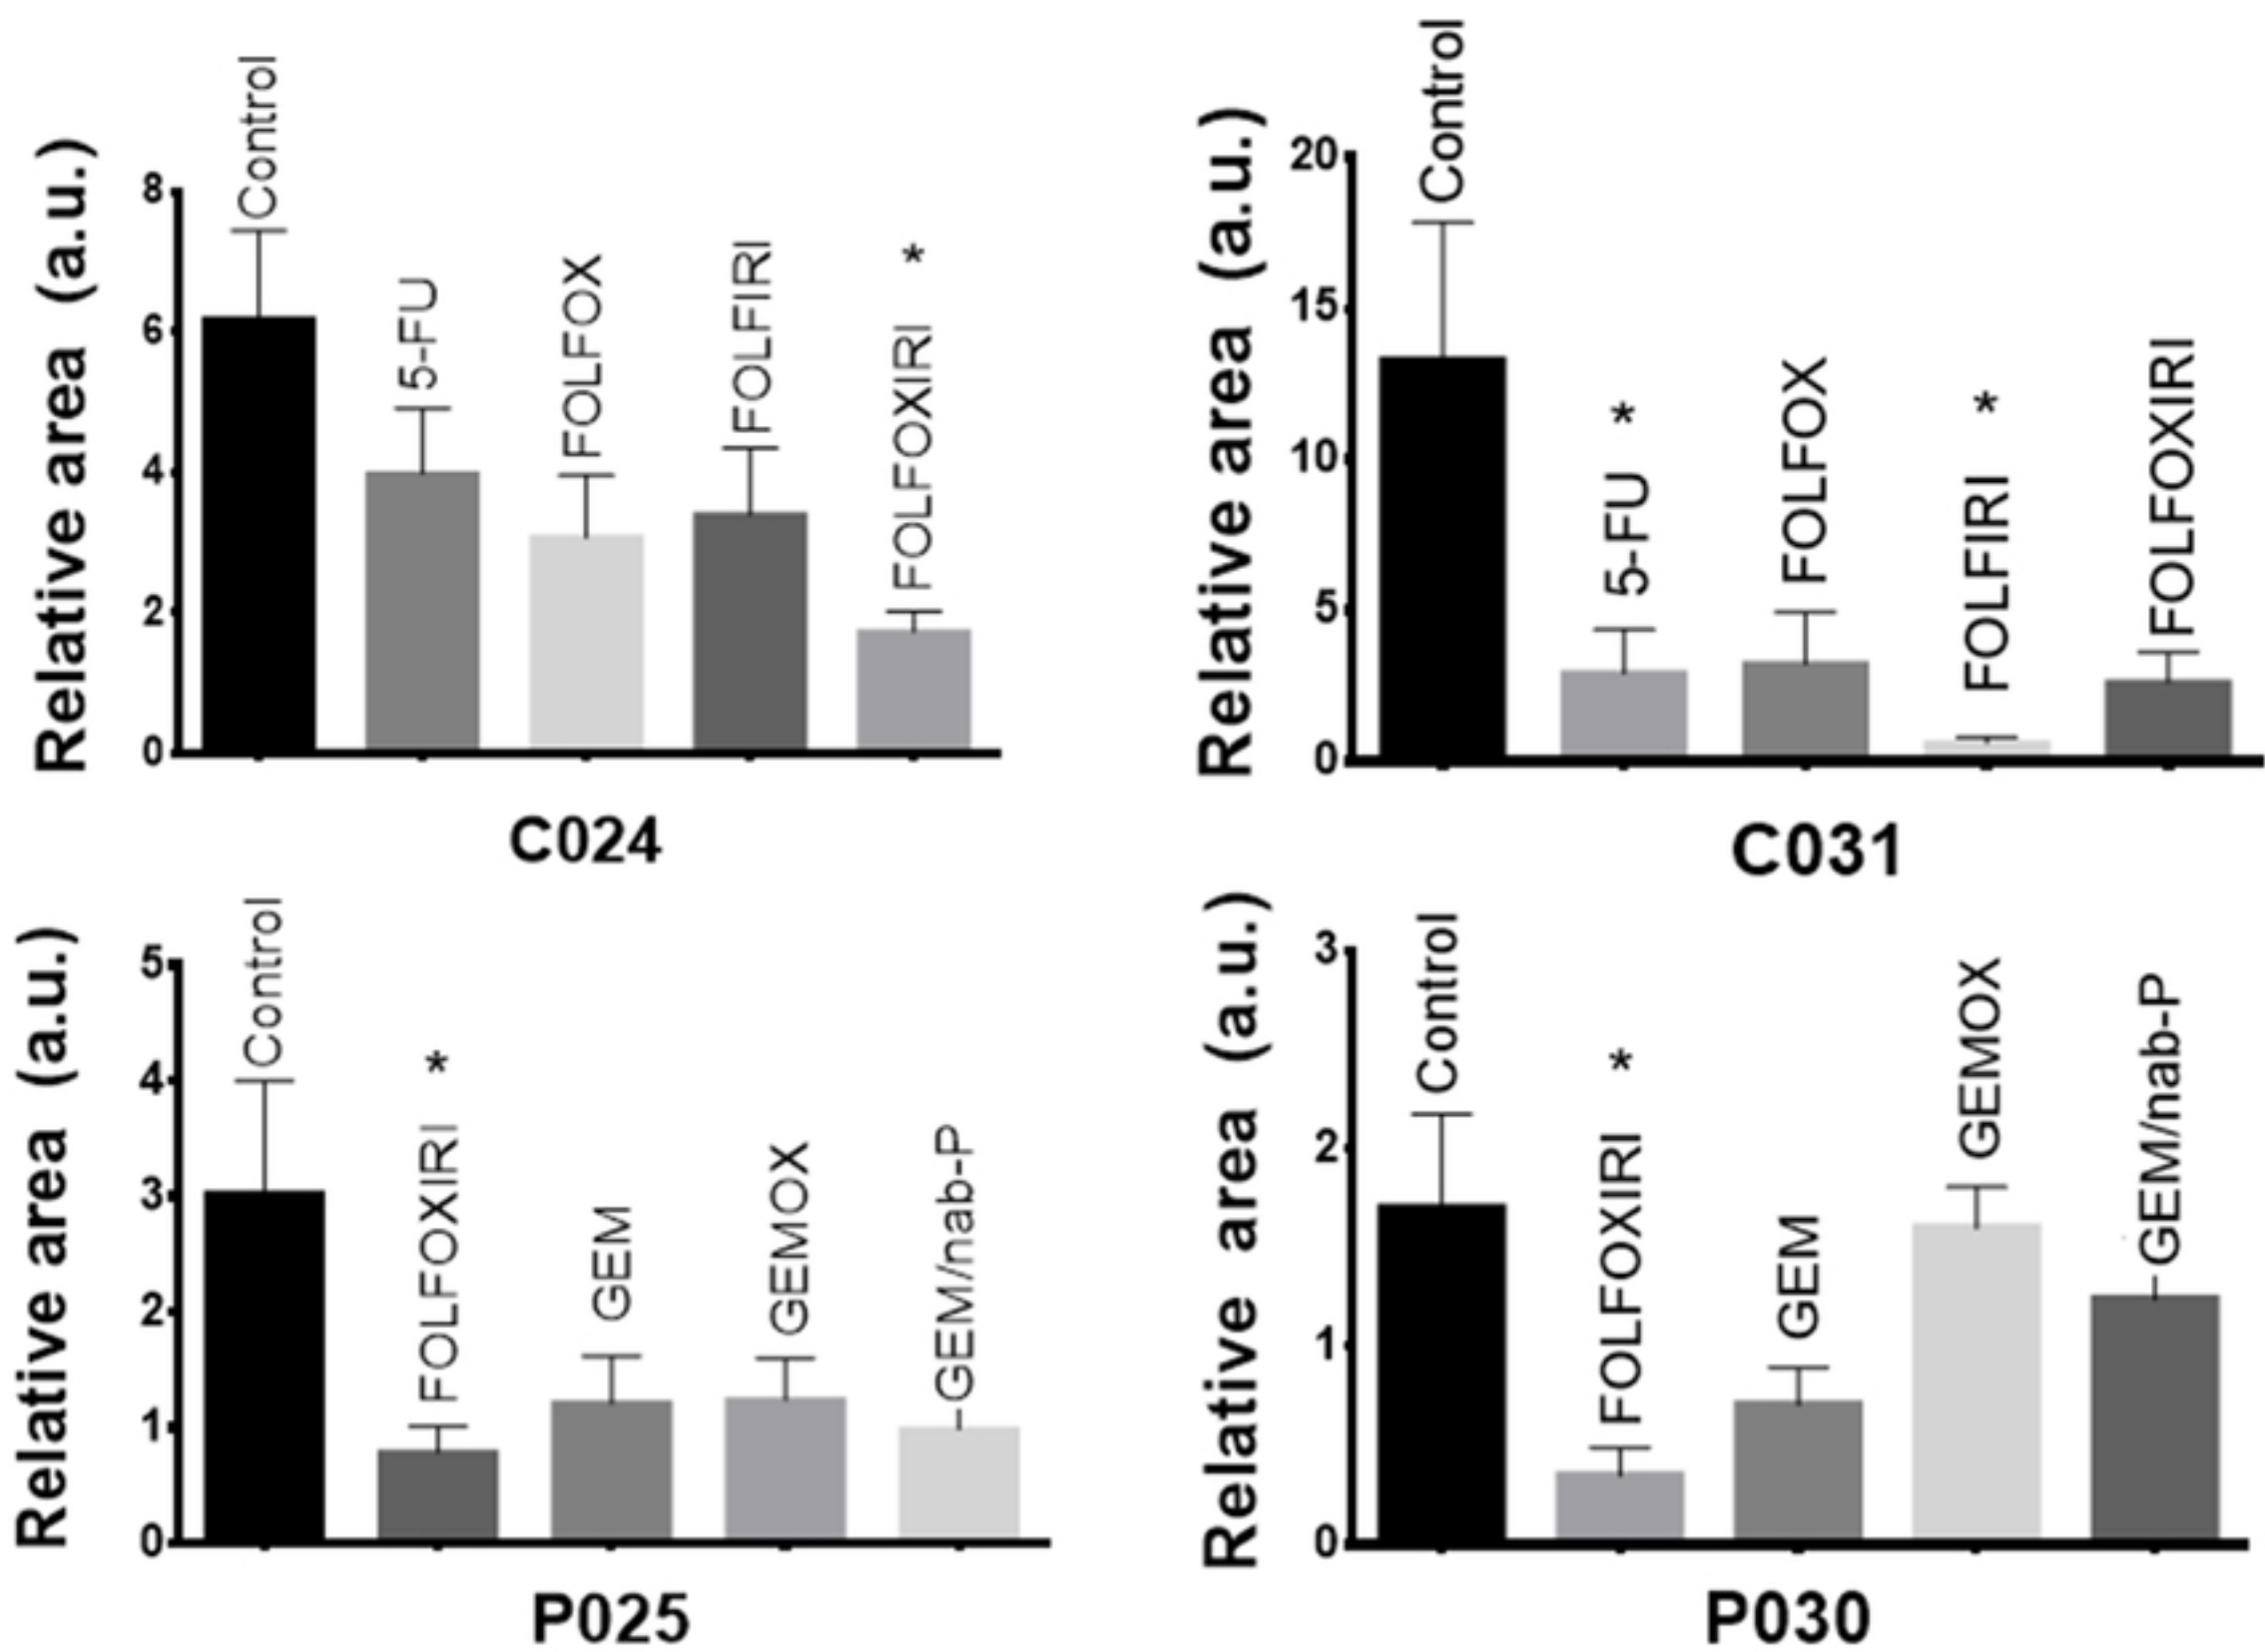

Figure 7
